# Supplementary material for: A Colorimetric LAMP Detection of Xylella fastidiosa in Crude Alkaline Sap of Olive Trees in Apulia as a Field-Based Tool for Disease Containment
Source: MDPI journal article supplement (doi:10.3390/agriculture13020448), 2023-02-14
Supplement: s1 [file s1]

Archive with 1 entries (1 files):
- agriculture-2169454-supplementary.pdf
